# Supplementary material for: Biological Network Approach for the Identification of Regulatory Long Non-Coding RNAs Associated With Metabolic Efficiency in Cattle
Source: Front Genet. 2019 Nov 22;10:1130. doi: 10.3389/fgene.2019.01130 (PMC6883949; doi:10.3389/fgene.2019.01130)
Supplement: Supplementary file 7 [file Table_5.xlsx]

## Sheet: notes
Supplementary Table 5: Supportive information for figures 4, 5, and 6: lists containing genes and metabolites significantly correlated with one of the three hub long non-coding (lnc) RNAs from the co-expression networks. Lists were subjected to Ingenuity Pathway Analysis for enrichment analyses.
Supportive information for Figures 4, 5, and 6.
Explanation:
The lists contain genes significantly correlated with one of the three hub lncRNAs, which displayed high connectivity (>100 nodes) in either the high or low metabolic efficiency network. MSTRG.4740 and MSTRG.10337 were hub lncRNAs in the low PCIT network and MSTRG.17681 had over 100 connections in the high PCIT network. Additionally, the metabolites whichs' plasma levels correlated significantly …
Abbreviations:
PCIT	Partial Correlation and Information Theory
lnc	long non-coding RNA
QTL	quantitative trait locus (here: gene that contains a QTL for residual feed intake or milk production)
TS	tissue specific expression in either jejunum, liver, muscle or rumen
DE	differential expression in either jejunum, liver or muscle (there were no DE genes in rumen)

## Sheet: MSTRG.4740_metabolites
Metabolites correlated (p < 0.05, Pearson correlation) with expression of MSTRG.4740 in jejunum
metabolite	COMP_ID	CHEMICAL_ID	PUBCHEM	CHEMSPIDER	KEGG	HMDB_ID	Correlation coefficient	p-value
allantoic_acid	33434	218	203	198	C00499	HMDB01209	0.336752	0.0192632
pentadecanoate_(15:0)	1361	980	13849	13249	C16537	HMDB00826	0.474569	0.000654681
stearate_(18:0)	1358	439	5281	5091	C01530	HMDB00827	0.43937	0.00178183
arachidate_(20:0)	1118	893	10467	10035	C06425	HMDB02212	0.338272	0.0186912
13-methylmyristate	38293	100002344	151014	133106	NA	NA	0.415562	0.00331068
hexanoylglycine	35436	100001527	99463	89859	NA	HMDB00701	0.330806	0.021644
deoxycarnitine	36747	100001662	134	705	C01181	HMDB01161	-0.372717	0.00908227
carnitine	15500	100000007	10917	10455	C00318	HMDB00062	-0.32543	0.0240056
3-hydroxyhexanoate	53230	100006367	151492	133518	NA	NA	0.33903	0.0184116
sphingomyelin_(d18:2/24:2)*	57479	100015789	NA	NA	NA	NA	-0.323121	0.025084
lysine	1301	407	5962	5747	C00047	HMDB00182	-0.296078	0.0410245
5-(galactosylhydroxy)-L-lysine	43582	100002462	NA	NA	NA	NA	0.325225	0.0240998
alpha-hydroxyisovalerate	46537	100001300	99823	90190	NA	HMDB00407	0.415779	0.00329265
3-hydroxy-2-ethylpropionate	32397	100001170	188979	164207	NA	HMDB00396	0.342161	0.0172931
valine	1649	566	6287	6050	C00183	HMDB00883	-0.340878	0.0177442
ornithine	1493	444	6262	6026	C00077	HMDB03374	-0.388243	0.00639527
1-arachidonoyl-GPI_(20:4)*	34214	100001654	NA	NA	NA	HMDB61690	0.327638	0.0230108
1-palmitoyl-2-oleoyl-GPE_(16:0/18:1)	19263	1526	5283496	4446615	NA	HMDB05320	0.293995	0.0425365
1-(1-enyl-palmitoyl)-2-arachidonoyl-GPE_(P-16:0/20:4)*	52673	100009002	NA	24769238	NA	NA	0.30361	0.0359208
1-(1-enyl-palmitoyl)-2-palmitoyl-GPC_(P-16:0/16:0)*	52716	100009162	11146967	9322076	NA	NA	0.370768	0.00948021
1,2-dioleoyl-GPC_(18:1/18:1)	52457	100008905	10350317	8525772	NA	NA	0.324351	0.0245045
glycine	58	340	750	730	C00037	HMDB00123	0.290983	0.0448034
mead_acid_(20:3n9)	35174	100001472	5312531	4471956	NA	HMDB10378	0.337369	0.0190291
citrate	1564	1124	311	305	C00158	HMDB00094	0.287521	0.0475285
1-stearoyl-2-arachidonoyl-GPS_(18:0/20:4)	52235	100001872	NA	NA	NA	NA	0.330474	0.0217841
gamma-carboxyglutamate	38754	100002679	40772	37241	NA	HMDB41900	0.392066	0.00585124
3-methyl-2-oxobutyrate	44526	100000936	49	48	C00141	HMDB00019	0.296745	0.0405502
phenylpyruvate	566	241	997	972	C00166	HMDB00205	-0.306551	0.0340751
eicosapentaenoate_(EPA;_20:5n3)	18467	2050	446284	393682	C06428	HMDB01999	0.370399	0.00955714
margarate_(17:0)	1121	891	10465	10033	NA	HMDB02259	0.440994	0.00170529
sphingomyelin_(d18:2/21:0,_d16:2/23:0)*	57480	100015790	NA	NA	NA	NA	0.313655	0.0299389
1-palmitoyl-2-palmitoleoyl-GPC_(16:0/16:1)*	52470	100008984	NA	NA	NA	NA	0.320639	0.0262887
aconitate_[cis_or_trans]	46173	100001359	NA	NA	C00417	HMDB00072	0.303303	0.0361179
2-palmitoyl-GPC_(16:0)*	35253	100001562	15061532	21403165	NA	HMDB61702	0.303637	0.0359035
10-heptadecenoate_(17:1n7)	33971	100001278	5312435	4471860	NA	HMDB60038	0.475944	0.000628197
10-nonadecenoate_(19:1n9)	33972	100001277	5312513	4471938	NA	HMDB13622	0.442284	0.00164662
2-aminoheptanoate	43761	100004542	227939	198338	NA	NA	0.313479	0.0300361
palmitate_(16:0)	1336	424	985	960	C00249	HMDB00220	0.462161	0.000943231
cytidine	514	827	6175	5940	C00475	HMDB00089	0.29581	0.0412166
2-hydroxypalmitate	35675	100001579	92836	83805	NA	HMDB31057	0.312145	0.0307817
5-methylcytidine	22119	100000763	92918	83877	NA	HMDB00982	0.326347	0.023588
laurate_(12:0)	1645	181	3893	3756	C02679	HMDB00638	0.359567	0.012071
phenylalanine	64	460	6140	5910	C00079	HMDB00159	-0.334893	0.0199824
myristate_(14:0)	1365	519	11005	10539	C06424	HMDB00806	0.473361	0.000678798
linolenate_[alpha_or_gamma;_(18:3n3_or_6)]	34035	100001337	5280934	4444437	C06426	HMDB03073	0.413463	0.00348921
17-methylstearate	38296	100002356	3083779	2340933	NA	NA	0.403492	0.00445814
stearidonate_(18:4n3)	33969	100001229	5312508	4471933	C16300	HMDB06547	0.47265	0.000693337
tigloylglycine	1598	1161	6441567	4945715	NA	HMDB00959	0.381361	0.0074862
oleate/vaccenate_(18:1)	52285	100008930	NA	NA	NA	NA	0.473781	0.000670312
N-acetylglycine	27710	100001006	10972	10507	NA	HMDB00532	0.375535	0.00853251
N-glycolylneuraminate	37123	100001491	123802	3794850	C03410	HMDB00833	0.47635	0.000620546
15-methylpalmitate	38768	100002945	17903417	NA	NA	NA	0.434941	0.00200622
7-ketodeoxycholate	31904	100001063	188292	163659	NA	HMDB00391	0.399872	0.00486414
nonadecanoate_(19:0)	1356	892	12591	12071	C16535	HMDB00772	0.436309	0.00193441
palmitoleoylcarnitine_(C16:1)*	53223	100009406	NA	28639183	NA	NA	0.334756	0.0200364
tryptophan	54	565	6305	6066	C00078	HMDB00929	-0.292003	0.0440249
palmitoleate_(16:1n7)	33447	452	445638	393216	C08362	HMDB03229	0.476375	0.000620075
imidazole_lactate	15716	100000263	440129	389128	C05568	HMDB02320	0.41879	0.00305181
docosapentaenoate_(n3_DPA;_22:5n3)	32504	100001181	6441454	NA	C16513	HMDB01976	0.308266	0.0330361
dihomo-linolenate_(20:3n3_or_n6)	35718	100001739	5280581	4471954	C03242	HMDB02925	0.292023	0.0440093
myristoleoylcarnitine_(C14:1)*	48182	100006051	NA	NA	NA	NA	0.320941	0.0261396
myristoleate_(14:1n5)	32418	100001198	5281119	4444564	C08322	HMDB02000	0.481714	0.000527201
sphingosine_1-phosphate	34445	100000626	5283560	4446673	C06124	HMDB00277	0.43723	0.00188731
orotate	1505	445	967	942	C00295	HMDB00226	0.338399	0.0186441
5,6-dihydrothymine	1418	158	93556	84456	C00906	HMDB00079	0.430478	0.00225742
eicosenoate_(20:1)	33587	100001335	5282768	4445895	NA	HMDB02231	0.426382	0.002512
1,2-dipalmitoyl-GPC_(16:0/16:0)	19130	100000657	452110	398235	NA	HMDB00564	-0.288135	0.0470355
linoleate_(18:2n6)	1105	180	5280450	4444105	C01595	HMDB00673	0.41252	0.00357214
margaroylcarnitine*	57512	100004054	NA	NA	NA	NA	0.294898	0.0418759
phosphate	42109	461	1061	1032	C00009	HMDB01429	-0.335112	0.0198965
3-ureidoisobutyrate	57549	100001531	160663	141172	C05100	HMDB02031	0.45707	0.0010914
2-hydroxy-3-methylvalerate	36746	100001541	164623	144317	NA	HMDB00317	0.327439	0.023099
thyroxine	2761	1094	5819	5614	C01829	HMDB01918	-0.42411	0.00266395
sphingomyelin_(d18:1/21:0,_d17:1/22:0,_d16:1/23:0)*	52495	100009025	NA	NA	NA	NA	0.372692	0.00908735
mannose	48153	803	18950	141983	C00159	HMDB00169	-0.38846	0.00636323
homoarginine	22137	100000961	9085	8732	C01924	HMDB00670	-0.361319	0.0116295
tyrosine	1299	815	6057	5833	C00082	HMDB00158	-0.327156	0.023225
N6-carboxymethyllysine	36713	100001768	NA	11217184	NA	NA	0.464815	0.000873354
N-methylproline	37431	100001956	557	541	NA	NA	0.450983	0.00129559
docosadienoate_(22:2n6)	32415	100001182	5282807	4445934	C16533	HMDB61714	0.424828	0.00261503
stachydrine	34384	100001296	115244	103115	C10172	HMDB04827	0.357984	0.012482
1-(1-enyl-palmitoyl)-2-oleoyl-GPC_(P-16:0/18:1)*	52478	100009007	NA	NA	NA	NA	0.357619	0.0125785
dihomo-linoleate_(20:2n6)	17805	1231	6439848	4944228	C16525	HMDB05060	0.373804	0.00886675
glucose	20488	572	79025	71358	C00031	HMDB00122	-0.319985	0.0266138
sphingomyelin_(d18:2/23:1)*	57482	100015791	NA	NA	NA	NA	0.31322	0.0301798
palmitoylcarnitine_(C16)	44681	100000776	461	448	C02990	HMDB00222	0.298072	0.0396188
3-methylcrotonylglycine	31940	100001149	169485	148224	NA	HMDB00459	0.365051	0.0107354
sphingomyelin_(d18:2/23:0,_d18:1/23:1,_d17:1/24:1)*	52435	100008956	NA	NA	NA	NA	0.338876	0.0184679
sphingomyelin_(d18:1/17:0,_d17:1/18:0,_d19:1/16:0)	52615	100008920	NA	NA	NA	NA	-0.416398	0.00324188
1-palmitoyl-GPI_(16:0)	35305	100001655	NA	NA	NA	HMDB61695	0.312236	0.03073
oleoylcarnitine_(C18:1)	35160	100001501	6441392;53477789	21403150	NA	HMDB05065	0.354791	0.0133478
erucate_(22:1n9)	1552	1087	5281116	7924	C08316	HMDB02068	0.347451	0.0155343
betaine	3141	799	247	24219951173	C00719	HMDB00043	-0.295787	0.0412331
erythritol	20699	100000846	222285	13835932	C00503	HMDB02994	0.289502	0.0459532
behenoyl_sphingomyelin_(d18:1/22:0)*	48492	100006294	NA	NA	NA	NA	0.333287	0.0206221
C-glycosyltryptophan	48782	100006379	10981970	9157171	NA	NA	0.444372	0.0015554
arginine	1638	231	232	227	C00062	HMDB00517	-0.356572	0.0128588
ceramide_(d18:1/14:0,_d16:1/16:0)*	57432	100015735	NA	NA	NA	NA	0.294421	0.0422239
N-monomethylarginine	43586	100004488	132862	117259	C03884	HMDB29416	-0.29531	0.0415765
1-stearoyl-2-oleoyl-GPI_(18:0/18:1)*	52726	100009181	NA	NA	NA	NA	0.339337	0.0182992
cholate	22842	136	221493	NA	C00695	HMDB00619	0.291619	0.0443162
N-stearoyl-sphingosine_(d18:1/18:0)*	54979	1547	5283565	4446678	NA	HMDB04950	0.318342	0.0274458
2-hydroxybutyrate/2-hydroxyisobutyrate	52281	100008928	NA	NA	NA	NA	0.331564	0.0213276
glycerol	15122	1254	753	733	C00116	HMDB00131	0.398392	0.00503924
homocitrulline	22138	100000963	65072	58582	C02427	HMDB00679	0.310343	0.0318123
succinylcarnitine_(C4-DC)	37058	100001948	NA	NA	NA	NA	0.343525	0.0168241
N-palmitoylglycine	42092	100003686	151008	133100	NA	NA	0.371227	0.00938527
caprate_(10:0)	1642	888	2969	2863	C01571	HMDB00511	0.311698	0.0310348
sphingomyelin_(d18:0/20:0,_d16:0/22:0)*	57476	100015786	NA	NA	NA	NA	0.327753	0.0229598
1-methylhistidine	30460	100001051	92105	83153	C01152	HMDB00001	0.337623	0.0189336
lignoceroyl_sphingomyelin_(d18:1/24:0)	57330	100006298	NA	24846875	NA	NA	0.317773	0.027739
tricosanoyl_sphingomyelin_(d18:1/23:0)*	52436	100008955	NA	NA	NA	NA	0.358015	0.0124739
3-ureidopropionate	3155	1053	111	109	C02642	HMDB00026	0.335065	0.0199151
arabitol/xylitol	48885	100006430	NA	NA	NA	NA	0.342801	0.0170719
laurylcarnitine_(C12)	34534	100001392	10427569	8602997	NA	HMDB02250	0.284697	0.0498508
1-palmitoyl-2-oleoyl-GPI_(16:0/18:1)*	52669	100009066	NA	24767668	NA	NA	0.400266	0.00481842
3-methylcytidine	35132	100001466	159649	9164190	NA	NA	0.327146	0.0232293

## Sheet: MSTRG.4740_genes
Genes correlated (p<0.05, |r|>0.8) with MSTRG.4740 in PCIT network specific for low metabolic efficiency
Node 1	Node 2	correlation strength r	correlation direction	lnc	TS	DE	QTL
MSTRG_6280	MSTRG_4740	0.82698	POS	1	0	1	0
MSTRG_6855	MSTRG_4740	0.8024	POS	1	0	0	0
MSTRG_7365	MSTRG_4740	0.85043	POS	1	0	0	0
MSTRG_7818	MSTRG_4740	0.80439	POS	1	0	0	0
ACIN1	MSTRG_4740	0.84002	POS	0	0	1	0
ACTR5	MSTRG_4740	0.80836	POS	0	0	0	1
ALYREF	MSTRG_4740	0.82381	POS	0	0	1	1
AMBRA1	MSTRG_4740	0.80048	POS	0	0	1	0
ANAPC11	MSTRG_4740	0.82114	POS	0	0	0	1
ANKRD17	MSTRG_4740	0.83032	POS	0	0	0	1
ARFIP2	MSTRG_4740	0.83823	POS	0	0	1	0
ARID4A	MSTRG_4740	0.8577	POS	0	0	0	1
ARID4B	MSTRG_4740	0.86167	POS	0	0	1	0
ARL16	MSTRG_4740	0.84048	POS	0	0	0	1
ARSB	MSTRG_4740	0.80439	POS	0	0	0	1
B9D1	MSTRG_4740	0.81567	POS	0	0	1	1
BIRC5	MSTRG_4740	0.80936	POS	0	0	0	1
BORCS5	MSTRG_4740	0.81797	POS	0	0	0	1
BTBD8	MSTRG_4740	0.81653	POS	0	0	0	1
BTG3	MSTRG_4740	0.81653	POS	0	0	1	0
C14H8orf33	MSTRG_4740	0.83549	POS	0	0	0	1
C1H21orf59	MSTRG_4740	0.89543	POS	0	0	0	1
C26H10ORF4	MSTRG_4740	0.86434	POS	0	0	1	0
CA3	MSTRG_4740	-0.85143	NEG	0	0	1	0
CCDC32	MSTRG_4740	0.81028	POS	0	0	1	0
CDK6	MSTRG_4740	0.88226	POS	0	0	1	0
CHM	MSTRG_4740	0.81117	POS	0	0	1	0
CITED2	MSTRG_4740	0.84423	POS	0	0	1	0
CNOT3	MSTRG_4740	0.81151	POS	0	0	1	0
CPSF7	MSTRG_4740	0.84682	POS	0	0	1	0
CRNKL1	MSTRG_4740	0.88616	POS	0	0	1	0
CRTAP	MSTRG_4740	0.84656	POS	0	0	1	0
CWF19L1	MSTRG_4740	0.84794	POS	0	0	0	1
DDX20	MSTRG_4740	0.84875	POS	0	0	1	0
DHX35	MSTRG_4740	0.83653	POS	0	0	0	1
DHX38	MSTRG_4740	0.86032	POS	0	0	1	0
DIS3L2	MSTRG_4740	0.8222	POS	0	0	1	0
DLG1	MSTRG_4740	0.83779	POS	0	0	0	1
EIF3E	MSTRG_4740	0.82977	POS	0	0	1	0
EMD	MSTRG_4740	0.81748	POS	0	0	1	0
EME1	MSTRG_4740	0.82805	POS	0	0	1	0
ENSBTAG00000009783	MSTRG_4740	0.80853	POS	0	0	0	1
ENSBTAG00000012058	MSTRG_4740	0.81412	POS	0	0	0	1
ENSBTAG00000021801	MSTRG_4740	0.85864	POS	0	0	1	0
ENSBTAG00000045937	MSTRG_4740	0.81753	POS	0	0	1	0
ENSBTAG00000047207	MSTRG_4740	0.81759	POS	0	0	1	0
EXOSC1	MSTRG_4740	0.86726	POS	0	0	1	0
EZH2	MSTRG_4740	0.80164	POS	0	0	1	0
FADD	MSTRG_4740	0.80095	POS	0	0	0	1
FAM83H	MSTRG_4740	0.81579	POS	0	0	0	1
FBRS	MSTRG_4740	0.80995	POS	0	0	1	0
FLNB	MSTRG_4740	0.85708	POS	0	0	1	0
FOXP1	MSTRG_4740	0.87335	POS	0	0	0	1
FSCN1	MSTRG_4740	0.81533	POS	0	0	1	0
GEMIN2	MSTRG_4740	0.86612	POS	0	0	0	1
GIGYF1	MSTRG_4740	0.83142	POS	0	0	1	0
GLE1	MSTRG_4740	0.8498	POS	0	0	1	0
GNAI1	MSTRG_4740	0.86026	POS	0	0	1	0
HINFP	MSTRG_4740	0.86695	POS	0	0	1	0
HMGB1	MSTRG_4740	0.87915	POS	0	0	1	0
INTS4	MSTRG_4740	0.88349	POS	0	0	1	0
INTS9	MSTRG_4740	0.8197	POS	0	0	1	0
ITGA2	MSTRG_4740	0.80168	POS	0	0	1	0
KAT5	MSTRG_4740	0.86897	POS	0	0	1	0
KLF3	MSTRG_4740	0.84723	POS	0	0	1	0
LMBR1	MSTRG_4740	0.83355	POS	0	0	1	0
LNX2	MSTRG_4740	0.80696	POS	0	0	1	0
MBD4	MSTRG_4740	0.81864	POS	0	0	1	0
MED19	MSTRG_4740	0.86868	POS	0	0	0	1
MORC2	MSTRG_4740	0.8147	POS	0	0	1	0
MRGBP	MSTRG_4740	0.80695	POS	0	0	1	0
MSTRG_1049	MSTRG_4740	0.8808	POS	1	0	0	0
MSTRG_12666	MSTRG_4740	0.8285	POS	0	0	1	0
MSTRG_1272	MSTRG_4740	0.85029	POS	0	0	1	0
MSTRG_13319	MSTRG_4740	0.80505	POS	0	0	1	0
MSTRG_15658	MSTRG_4740	0.85007	POS	0	0	1	0
MSTRG_18194	MSTRG_4740	0.8585	POS	1	0	0	0
MSTRG_184	MSTRG_4740	0.82492	POS	0	0	1	0
MSTRG_18570	MSTRG_4740	0.81319	POS	1	0	0	0
MSTRG_19190	MSTRG_4740	0.81613	POS	0	0	1	0
MSTRG_21084	MSTRG_4740	0.81936	POS	1	0	0	0
MSTRG_2700	MSTRG_4740	0.87842	POS	1	0	0	0
MYC	MSTRG_4740	0.82537	POS	0	0	1	1
MYEF2	MSTRG_4740	0.83752	POS	0	0	1	0
NEIL1	MSTRG_4740	0.81785	POS	0	0	1	0
NPM1	MSTRG_4740	0.87153	POS	0	0	0	1
NUMB	MSTRG_4740	0.88308	POS	0	0	1	1
OSBPL2	MSTRG_4740	0.82923	POS	0	0	1	0
PAN2	MSTRG_4740	0.86191	POS	0	0	1	0
PGAM5	MSTRG_4740	0.81147	POS	0	0	1	0
PGM3	MSTRG_4740	0.80958	POS	0	0	1	0
PIGN	MSTRG_4740	0.85767	POS	0	0	0	1
PLEKHA7	MSTRG_4740	0.81092	POS	0	0	0	1
PNN	MSTRG_4740	0.80779	POS	0	0	0	1
PPP1R3C	MSTRG_4740	-0.81122	NEG	0	0	1	0
PQBP1	MSTRG_4740	0.83302	POS	0	0	1	0
PRPF6	MSTRG_4740	0.81203	POS	0	0	1	0
PRR14	MSTRG_4740	0.81627	POS	0	0	1	0
PUM3	MSTRG_4740	0.84965	POS	0	0	0	1
RAD18	MSTRG_4740	0.85921	POS	0	0	1	0
REEP4	MSTRG_4740	0.89569	POS	0	0	1	0
RGL2	MSTRG_4740	0.83034	POS	0	0	1	0
RIOK1	MSTRG_4740	0.80842	POS	0	0	1	0
RIOX1	MSTRG_4740	0.88022	POS	0	0	0	1
RPAP2	MSTRG_4740	0.83384	POS	0	0	0	1
RPL23A	MSTRG_4740	0.81258	POS	0	0	0	1
RPL26	MSTRG_4740	0.82841	POS	0	0	1	0
RPL27A	MSTRG_4740	0.82949	POS	0	0	0	1
RPL31	MSTRG_4740	0.83068	POS	0	0	1	0
RPL35	MSTRG_4740	0.82173	POS	0	0	1	0
RPL37	MSTRG_4740	0.8622	POS	0	0	1	0
RPS7	MSTRG_4740	0.84469	POS	0	0	1	0
RXRB	MSTRG_4740	0.82999	POS	0	0	1	0
SAFB2	MSTRG_4740	0.83265	POS	0	0	1	0
SCYL3	MSTRG_4740	0.83511	POS	0	0	1	0
SECISBP2	MSTRG_4740	0.8118	POS	0	0	0	1
SF3B2	MSTRG_4740	0.8915	POS	0	0	1	0
SGK3	MSTRG_4740	0.86686	POS	0	0	0	1
SH3GL1	MSTRG_4740	0.84911	POS	0	0	1	0
SHKBP1	MSTRG_4740	0.86285	POS	0	0	1	0
SLC5A1	MSTRG_4740	0.84211	POS	0	0	0	1
SLF1	MSTRG_4740	0.84643	POS	0	0	1	0
SMARCAL1	MSTRG_4740	0.83333	POS	0	0	0	1
SMC2	MSTRG_4740	0.85488	POS	0	0	1	0
SMURF2	MSTRG_4740	0.82393	POS	0	0	1	0
SNRNP200	MSTRG_4740	0.85021	POS	0	0	1	0
SNRNP48	MSTRG_4740	0.82806	POS	0	0	1	0
TANK	MSTRG_4740	0.80803	POS	0	0	0	1
TASP1	MSTRG_4740	0.81135	POS	0	0	0	1
TCF25	MSTRG_4740	0.86605	POS	0	0	0	1
TM4SF18	MSTRG_4740	0.81167	POS	0	0	1	0
TOP2A	MSTRG_4740	0.81114	POS	0	0	1	0
TRAF3IP2	MSTRG_4740	0.87758	POS	0	0	0	1
TRMT12	MSTRG_4740	0.86472	POS	0	0	0	1
TTI1	MSTRG_4740	0.83557	POS	0	0	1	1
U2AF2	MSTRG_4740	0.84943	POS	0	0	1	0
WASF2	MSTRG_4740	0.86199	POS	0	0	1	0
WBSCR1	MSTRG_4740	0.88247	POS	0	0	1	0
WDHD1	MSTRG_4740	0.80534	POS	0	0	0	1
ZCCHC24	MSTRG_4740	-0.85236	NEG	0	0	1	1
ZDHHC5	MSTRG_4740	0.8482	POS	0	0	1	1
ZNF16	MSTRG_4740	0.83394	POS	0	0	0	1
ZNF200	MSTRG_4740	0.83723	POS	0	0	1	0
ZNF335	MSTRG_4740	0.82268	POS	0	0	1	1
ZNF623	MSTRG_4740	0.84685	POS	0	0	0	1
ZSCAN16	MSTRG_4740	0.85578	POS	0	0	1	0
ZSWIM8	MSTRG_4740	0.81274	POS	0	0	1	0

## Sheet: MSTRG.10337_metabolites
Metabolites correlated (p < 0.05, Pearson correlation) with expression of MSTRG.10337 in muscle
metabolite	COMP_ID	CHEMICAL_ID	PUBCHEM	CHEMSPIDER	KEGG	HMDB_ID	Correlation coefficient	p-value
gamma-glutamylglutamine	2730	1140	150914	133013	C05283	HMDB11738	-0.295718	0.0412828
1-linoleoyl-GPI_(18:2)*	36594	100001778	NA	NA	NA	NA	0.315766	0.028794
beta-hydroxyisovalerate	12129	1442	69362	62571	NA	HMDB00754	0.306458	0.0341324
1-stearoyl-2-arachidonoyl-GPS_(18:0/20:4)	52235	100001872	NA	NA	NA	NA	0.356741	0.0128132
trimethylamine_N-oxide	40406	100003397	1145	1113	C01104	HMDB00925	0.408949	0.00390209
2-methylcitrate/homocitrate	52282	100008929	NA	NA	NA	NA	0.363301	0.011147
glycerophosphorylcholine_(GPC)	15990	100000269	71920	571409	C00670	HMDB00086	0.321445	0.0258921
2-methylbutyrylglycine	31928	100001155	193872	168243	NA	HMDB00339	0.378177	0.00804327
p-cresol_sulfate	36103	100001315	4615423	3806480	C01468	HMDB11635	-0.333869	0.0203885
isovalerylglycine	35107	100001452	546304	475516	NA	HMDB00678	0.395999	0.00533396
arginine	1638	231	232	227	C00062	HMDB00517	-0.323262	0.0250172
2-hydroxybutyrate/2-hydroxyisobutyrate	52281	100008928	NA	NA	NA	NA	0.300177	0.0381782

## Sheet: MSTRG.10337_genes
Genes correlated (p<0.05, |r|>0.8) with MSTRG.10337in PCIT network specific for low metabolic efficiency
Node 1	Node 2	correlation strength r	correlation direction	lnc	TS	DE	QTL
MSTRG_1120	MSTRG_10337	0.90903	POS	1	1	0	0
MSTRG_11811	MSTRG_10337	0.83483	POS	1	0	1	0
MSTRG_12188	MSTRG_10337	0.91112	POS	1	1	0	0
MSTRG_12361	MSTRG_10337	0.89659	POS	0	0	1	0
MSTRG_12612	MSTRG_10337	0.91293	POS	0	1	0	0
MSTRG_1267	MSTRG_10337	0.91138	POS	0	1	0	0
MSTRG_1268	MSTRG_10337	0.90969	POS	1	1	0	0
MSTRG_13338	MSTRG_10337	0.90216	POS	1	1	0	0
MSTRG_13910	MSTRG_10337	0.90371	POS	0	1	0	0
MSTRG_13952	MSTRG_10337	0.91126	POS	1	1	0	0
MSTRG_14947	MSTRG_10337	0.90932	POS	1	1	0	0
MSTRG_15015	MSTRG_10337	0.91238	POS	0	1	0	0
MSTRG_15116	MSTRG_10337	0.90881	POS	1	1	0	0
MSTRG_15240	MSTRG_10337	0.91219	POS	0	1	0	0
MSTRG_15241	MSTRG_10337	0.9126	POS	1	1	0	0
MSTRG_15311	MSTRG_10337	0.90797	POS	1	0	0	0
MSTRG_15668	MSTRG_10337	0.90884	POS	1	1	0	0
MSTRG_15854	MSTRG_10337	0.90881	POS	1	1	0	0
MSTRG_15857	MSTRG_10337	0.9118	POS	1	1	0	0
MSTRG_15895	MSTRG_10337	-0.83282	NEG	1	0	0	0
MSTRG_16026	MSTRG_10337	0.91139	POS	1	1	0	0
MSTRG_16531	MSTRG_10337	0.91095	POS	0	1	0	0
MSTRG_16695	MSTRG_10337	-0.8013	NEG	1	0	1	0
MSTRG_17576	MSTRG_10337	0.90939	POS	1	1	0	0
MSTRG_18786	MSTRG_10337	0.91075	POS	1	1	0	0
MSTRG_18863	MSTRG_10337	0.90763	POS	1	1	0	0
MSTRG_20320	MSTRG_10337	0.90939	POS	1	1	0	0
MSTRG_20794	MSTRG_10337	0.913	POS	0	1	0	0
MSTRG_20849	MSTRG_10337	0.90263	POS	1	0	0	0
MSTRG_21161	MSTRG_10337	0.91162	POS	0	1	0	0
MSTRG_21218	MSTRG_10337	-0.81304	NEG	0	0	1	0
MSTRG_21303	MSTRG_10337	-0.85723	NEG	0	0	1	0
MSTRG_21481	MSTRG_10337	0.90821	POS	1	1	0	0
MSTRG_22546	MSTRG_10337	0.90701	POS	1	1	0	0
MSTRG_22548	MSTRG_10337	0.90648	POS	1	1	0	0
MSTRG_22926	MSTRG_10337	0.88619	POS	1	1	1	0
MSTRG_23158	MSTRG_10337	0.89539	POS	0	1	0	0
MSTRG_23798	MSTRG_10337	-0.80794	NEG	0	0	1	0
MSTRG_23886	MSTRG_10337	0.91925	POS	0	1	0	0
MSTRG_2574	MSTRG_10337	0.90881	POS	0	1	0	0
MSTRG_2576	MSTRG_10337	-0.81759	NEG	0	0	1	0
MSTRG_2743	MSTRG_10337	-0.80959	NEG	1	0	0	0
MSTRG_2918	MSTRG_10337	0.90903	POS	1	0	0	0
MSTRG_308	MSTRG_10337	0.90963	POS	0	1	0	0
MSTRG_4055	MSTRG_10337	0.90414	POS	1	0	0	0
MSTRG_5061	MSTRG_10337	0.90949	POS	1	1	0	0
MSTRG_5062	MSTRG_10337	0.90546	POS	1	1	0	0
MSTRG_5283	MSTRG_10337	-0.84417	NEG	1	0	1	0
MSTRG_6728	MSTRG_10337	-0.88914	NEG	0	0	1	0
MSTRG_6868	MSTRG_10337	0.90815	POS	1	1	0	0
MSTRG_7965	MSTRG_10337	0.91172	POS	1	1	0	0
MSTRG_8140	MSTRG_10337	0.90663	POS	1	1	0	0
MSTRG_8142	MSTRG_10337	0.90588	POS	1	1	0	0
MSTRG_8267	MSTRG_10337	0.90963	POS	1	1	0	0
MSTRG_8813	MSTRG_10337	0.90993	POS	1	1	0	0
MSTRG_8972	MSTRG_10337	0.91137	POS	0	1	0	0
MSTRG_8973	MSTRG_10337	0.9103	POS	1	1	0	0
MSTRG_8974	MSTRG_10337	0.90964	POS	1	1	0	0
MSTRG_8977	MSTRG_10337	0.9019	POS	1	1	0	0
MSTRG_8978	MSTRG_10337	0.88694	POS	0	1	0	0
MSTRG_9183	MSTRG_10337	0.91225	POS	1	1	0	0
MSTRG_9677	MSTRG_10337	0.88654	POS	1	1	0	0
MSTRG_9818	MSTRG_10337	0.90509	POS	1	1	0	0
ACTA1	MSTRG_10337	0.91785	POS	0	1	0	0
ACTN3	MSTRG_10337	0.91065	POS	0	1	0	0
ACTR10	MSTRG_10337	-0.80454	NEG	0	0	0	1
AKIP1	MSTRG_10337	-0.80002	NEG	0	0	0	1
AKR1A1	MSTRG_10337	-0.88428	NEG	0	0	0	1
ALKBH2	MSTRG_10337	-0.82351	NEG	0	0	0	1
AMPD1	MSTRG_10337	0.90661	POS	0	1	0	0
ANO5	MSTRG_10337	0.90862	POS	0	1	0	0
ARMC10	MSTRG_10337	-0.81684	NEG	0	0	0	1
ASB16	MSTRG_10337	0.90252	POS	0	1	0	0
ATP1B4	MSTRG_10337	0.90697	POS	0	1	0	0
ATP2A1	MSTRG_10337	0.91038	POS	0	1	0	0
BEST3	MSTRG_10337	0.8367	POS	0	0	0	1
C17orf75	MSTRG_10337	-0.8532	NEG	0	0	1	0
C20H5orf34	MSTRG_10337	-0.809	NEG	0	0	0	1
C2CD5	MSTRG_10337	-0.86508	NEG	0	0	1	0
CACNA1S	MSTRG_10337	0.91031	POS	0	1	0	0
CACNB1	MSTRG_10337	0.90853	POS	0	1	0	0
CACNG1	MSTRG_10337	0.91038	POS	0	1	0	0
CALU	MSTRG_10337	-0.84339	NEG	0	0	1	0
CAMK2A	MSTRG_10337	0.90705	POS	0	1	0	0
CAMK2B	MSTRG_10337	0.90982	POS	0	1	1	0
CASQ1	MSTRG_10337	0.91168	POS	0	1	0	0
CASQ2	MSTRG_10337	0.81571	POS	0	0	0	1
CAV3	MSTRG_10337	0.9121	POS	0	1	0	0
CAVIN2	MSTRG_10337	-0.84011	NEG	0	0	0	1
CAVIN4	MSTRG_10337	0.90889	POS	0	1	0	0
CDK10	MSTRG_10337	-0.84819	NEG	0	0	0	1
CDNF	MSTRG_10337	0.90321	POS	0	1	0	0
CHRNA1	MSTRG_10337	0.89993	POS	0	1	0	0
CKM	MSTRG_10337	0.91133	POS	0	1	0	0
CLP1	MSTRG_10337	-0.8364	NEG	0	0	0	1
CMPK1	MSTRG_10337	-0.80118	NEG	0	0	1	0
CMYA5	MSTRG_10337	0.8953	POS	0	1	1	0
CNIH1	MSTRG_10337	-0.8489	NEG	0	0	1	0
COBL	MSTRG_10337	0.86956	POS	0	0	0	1
CORO6	MSTRG_10337	0.91132	POS	0	1	0	0
COX6A2	MSTRG_10337	0.91173	POS	0	1	0	0
CTNS	MSTRG_10337	-0.84913	NEG	0	0	1	0
DCUN1D2	MSTRG_10337	0.90658	POS	0	1	0	0
DDIT4L	MSTRG_10337	0.91337	POS	0	1	0	0
DHRS7C	MSTRG_10337	0.90596	POS	0	1	0	0
DOCK11	MSTRG_10337	-0.82703	NEG	0	0	0	1
DUSP13	MSTRG_10337	0.91146	POS	0	1	0	0
ENSBTAG00000014417	MSTRG_10337	0.89278	POS	0	1	0	0
ENSBTAG00000033563	MSTRG_10337	-0.83847	NEG	0	0	1	0
ENSBTAG00000038849	MSTRG_10337	0.91	POS	0	1	0	0
ENSBTAG00000045889	MSTRG_10337	0.90682	POS	0	1	0	0
ENSBTAG00000046177	MSTRG_10337	0.89184	POS	0	1	0	0
ENSBTAG00000046307	MSTRG_10337	-0.85578	NEG	0	0	1	1
ENSBTAG00000046333	MSTRG_10337	0.90927	POS	0	1	0	0
ENSBTAG00000046688	MSTRG_10337	-0.83582	NEG	0	0	0	1
ENSBTAG00000047441	MSTRG_10337	-0.85659	NEG	0	0	1	0
ENSBTAG00000047806	MSTRG_10337	-0.85784	NEG	0	0	1	0
EPM2A	MSTRG_10337	0.84682	POS	0	1	0	0
ESD	MSTRG_10337	-0.85671	NEG	0	0	1	0
EYA1	MSTRG_10337	0.89882	POS	0	0	0	1
FAM96A	MSTRG_10337	-0.87202	NEG	0	0	1	0
FBXO40	MSTRG_10337	0.90996	POS	0	1	0	0
FIG4	MSTRG_10337	-0.81862	NEG	0	0	1	0
FRMD4B	MSTRG_10337	-0.86584	NEG	0	0	1	0
G6PC3	MSTRG_10337	-0.89036	NEG	0	0	1	0
GADL1	MSTRG_10337	0.90734	POS	0	1	1	0
GANC	MSTRG_10337	0.82516	POS	0	0	1	0
GAPDH	MSTRG_10337	0.85264	POS	0	0	0	1
GDAP1	MSTRG_10337	0.88769	POS	0	0	0	1
HDDC3	MSTRG_10337	-0.84871	NEG	0	0	1	0
HOMER1	MSTRG_10337	0.81568	POS	0	0	1	0
HRASLS	MSTRG_10337	0.90637	POS	0	1	0	0
HRC	MSTRG_10337	0.91186	POS	0	1	0	0
HSD17B12	MSTRG_10337	-0.8388	NEG	0	0	1	0
HSPD1	MSTRG_10337	-0.86051	NEG	0	0	1	0
IDH1	MSTRG_10337	-0.84765	NEG	0	0	1	0
IFFO1	MSTRG_10337	0.84915	POS	0	0	0	1
JPH1	MSTRG_10337	0.90753	POS	0	1	0	1
JSRP1	MSTRG_10337	0.91179	POS	0	1	0	0
KCNA7	MSTRG_10337	0.90695	POS	0	1	0	0
KCNJ11	MSTRG_10337	0.90556	POS	0	1	0	0
KLHL31	MSTRG_10337	0.9099	POS	0	1	0	0
KLHL33	MSTRG_10337	0.89932	POS	0	1	0	0
LDB3	MSTRG_10337	0.88249	POS	0	1	0	0
LGR4	MSTRG_10337	-0.8152	NEG	0	0	1	0
LINGO1	MSTRG_10337	0.90886	POS	0	1	1	0
LMOD2	MSTRG_10337	0.90686	POS	0	1	0	0
LRRC39	MSTRG_10337	0.91012	POS	0	1	0	0
MAFA	MSTRG_10337	0.89904	POS	0	0	0	1
MB	MSTRG_10337	0.90902	POS	0	1	0	0
MIEF2	MSTRG_10337	0.89341	POS	0	0	0	1
MIF	MSTRG_10337	-0.81642	NEG	0	0	0	1
MPDU1	MSTRG_10337	-0.8844	NEG	0	0	1	0
MRPL12	MSTRG_10337	-0.83282	NEG	0	0	0	1
MSTRG_10164	MSTRG_10337	0.91095	POS	1	1	0	0
MSTRG_10247	MSTRG_10337	0.9098	POS	1	1	0	0
MSTRG_10261	MSTRG_10337	0.84529	POS	1	0	0	0
MYADML2	MSTRG_10337	0.90365	POS	0	0	0	1
MYBPC1	MSTRG_10337	0.9113	POS	0	1	0	1
MYDGF	MSTRG_10337	-0.86783	NEG	0	0	1	0
MYL1	MSTRG_10337	0.91089	POS	0	1	0	0
MYL2	MSTRG_10337	0.91135	POS	0	1	0	0
MYL3	MSTRG_10337	0.90838	POS	0	1	0	0
MYLK2	MSTRG_10337	0.90803	POS	0	1	0	0
MYLPF	MSTRG_10337	0.9079	POS	0	1	0	0
MYOM2	MSTRG_10337	0.90999	POS	0	1	0	0
MYOZ3	MSTRG_10337	0.90208	POS	0	1	0	0
MYPN	MSTRG_10337	0.90737	POS	0	1	0	0
NEB	MSTRG_10337	0.91174	POS	0	1	0	0
NMRK2	MSTRG_10337	0.91365	POS	0	1	0	0
NT5C1A	MSTRG_10337	0.90245	POS	0	1	0	1
NUP54	MSTRG_10337	-0.84559	NEG	0	0	1	0
ORAOV1	MSTRG_10337	-0.8037	NEG	0	0	0	1
PAAF1	MSTRG_10337	-0.89058	NEG	0	0	0	1
PARVB	MSTRG_10337	0.90069	POS	0	1	0	0
PEBP4	MSTRG_10337	0.9089	POS	0	1	0	0
PFKFB3	MSTRG_10337	0.87092	POS	0	1	0	0
PGAM2	MSTRG_10337	0.9101	POS	0	1	0	0
PHKG1	MSTRG_10337	0.9052	POS	0	1	0	0
PID1	MSTRG_10337	-0.85661	NEG	0	0	1	1
PLCB1	MSTRG_10337	-0.8133	NEG	0	0	0	1
PON2	MSTRG_10337	-0.84009	NEG	0	0	1	0
POSTN	MSTRG_10337	-0.81263	NEG	0	0	1	0
PPAPDC3	MSTRG_10337	0.9099	POS	0	1	0	0
PPP1R27	MSTRG_10337	0.91101	POS	0	1	0	1
PPP1R3A	MSTRG_10337	0.90953	POS	0	1	0	0
PSMD8	MSTRG_10337	-0.81553	NEG	0	0	1	0
PTMA	MSTRG_10337	-0.85012	NEG	0	0	1	0
PTMA	MSTRG_10337	-0.85012	NEG	0	0	1	0
PTMA	MSTRG_10337	-0.86928	NEG	0	0	1	0
PTMA	MSTRG_10337	-0.86928	NEG	0	0	1	0
RABL2B	MSTRG_10337	-0.82495	NEG	0	0	1	0
RAPSN	MSTRG_10337	0.90839	POS	0	1	0	0
RBBP9	MSTRG_10337	-0.82784	NEG	0	0	1	0
REEP3	MSTRG_10337	-0.8513	NEG	0	0	0	1
RORA	MSTRG_10337	0.89801	POS	0	0	1	0
RTN2	MSTRG_10337	0.89888	POS	0	1	0	0
RYR1	MSTRG_10337	0.91025	POS	0	1	0	0
SCN1B	MSTRG_10337	0.91109	POS	0	1	0	0
SCN4A	MSTRG_10337	0.90736	POS	0	1	1	0
SCN4B	MSTRG_10337	0.90768	POS	0	1	0	0
SDF2	MSTRG_10337	-0.82888	NEG	0	0	0	1
SGCG	MSTRG_10337	0.91089	POS	0	1	0	0
SIX1	MSTRG_10337	0.90943	POS	0	1	1	0
SLC16A6	MSTRG_10337	0.86193	POS	0	1	1	0
SLC35E3	MSTRG_10337	-0.84178	NEG	0	0	1	0
SREK1IP1	MSTRG_10337	-0.84787	NEG	0	0	1	0
SRL	MSTRG_10337	0.90994	POS	0	1	0	0
STAC3	MSTRG_10337	0.9095	POS	0	1	0	0
TCEA1	MSTRG_10337	-0.83763	NEG	0	0	0	1
TJP2	MSTRG_10337	-0.8066	NEG	0	0	1	0
TMEM182	MSTRG_10337	0.90858	POS	0	1	0	0
TMEM199	MSTRG_10337	-0.85092	NEG	0	0	0	1
TMEM38A	MSTRG_10337	0.91666	POS	0	1	0	0
TMEM50A	MSTRG_10337	-0.83639	NEG	0	0	1	0
TMOD4	MSTRG_10337	0.91262	POS	0	1	0	0
TNFRSF1A	MSTRG_10337	-0.80882	NEG	0	0	0	1
TNNC1	MSTRG_10337	0.91174	POS	0	1	0	0
TNNC2	MSTRG_10337	0.90825	POS	0	1	0	0
TNNI1	MSTRG_10337	0.91042	POS	0	1	0	0
TNNI2	MSTRG_10337	0.91112	POS	0	1	0	0
TNNT1	MSTRG_10337	0.91183	POS	0	1	0	0
TNNT3	MSTRG_10337	0.90989	POS	0	1	0	0
TOMM22	MSTRG_10337	-0.86553	NEG	0	0	1	0
TTN	MSTRG_10337	0.91083	POS	0	1	0	0
TXLNB	MSTRG_10337	0.90877	POS	0	1	0	0
UFC1	MSTRG_10337	-0.89155	NEG	0	0	1	0
UFD1	MSTRG_10337	-0.82892	NEG	0	0	1	0
UMPS	MSTRG_10337	-0.80575	NEG	0	0	0	1
UNC45B	MSTRG_10337	0.90782	POS	0	1	0	0
UQCC2	MSTRG_10337	0.90383	POS	0	0	0	1
WEE1	MSTRG_10337	-0.8306	NEG	0	0	0	1
WNK2	MSTRG_10337	0.81868	POS	0	0	0	1
XIAP	MSTRG_10337	-0.81571	NEG	0	0	1	0
YIPF7	MSTRG_10337	0.9072	POS	0	1	0	0
ZNF397	MSTRG_10337	-0.81738	NEG	0	0	1	0
ZNF419	MSTRG_10337	-0.81773	NEG	0	0	1	0
ZNF45	MSTRG_10337	-0.80369	NEG	0	0	0	1
ZNF567	MSTRG_10337	-0.83744	NEG	0	0	1	0

## Sheet: MSTRG.17681_metabolites
Metabolites correlated (p < 0.05, Pearson correlation) with expression of MSTRG.17681 in jejunum
metabolite	COMP_ID	CHEMICAL_ID	PUBCHEM	CHEMSPIDER	KEGG	HMDB_ID	Correlation coefficient	p-value
N-acetyltaurine	48187	100005466	159864	140553	NA	NA	-0.298635	0.0392289
heptanoate_(7:0)	1644	925	8094	7803	C17714	HMDB00666	-0.288533	0.0467184
caprylate_(8:0)	32492	932	379	370	C06423	HMDB00482	-0.357462	0.0126203

## Sheet: MSTRG.17681_genes
Genes correlated (p<0.05, |r|>0.8) with MSTRG.17681 in PCIT network specific for high metabolic efficiency
Node 1	Node 2	correlation strength r	correlation direction	lnc	TS	DE	QTL
MSTRG_18433	MSTRG_17681	0.88727	POS	1	0	0	0
MSTRG_19097	MSTRG_17681	0.80052	POS	0	0	1	0
MSTRG_19312	MSTRG_17681	0.851	POS	1	0	0	0
MSTRG_20071	MSTRG_17681	0.82656	POS	1	0	1	0
MSTRG_20651	MSTRG_17681	0.85077	POS	0	0	1	0
MSTRG_4214	MSTRG_17681	0.80996	POS	0	0	1	0
MSTRG_4964	MSTRG_17681	-0.8119	NEG	1	0	1	0
MSTRG_794	MSTRG_17681	0.88567	POS	1	0	1	0
MSTRG_8561	MSTRG_17681	0.87092	POS	0	0	1	0
MSTRG_9051	MSTRG_17681	0.83069	POS	1	0	0	0
AGFG1	MSTRG_17681	0.81118	POS	0	0	1	0
ALDH3A2	MSTRG_17681	0.80519	POS	0	0	0	1
ALDH9A1	MSTRG_17681	0.8098	POS	0	0	1	0
ARCN1	MSTRG_17681	0.89044	POS	0	0	1	0
ARF1	MSTRG_17681	0.84651	POS	0	0	1	0
ARFGAP3	MSTRG_17681	0.85856	POS	0	0	1	0
ARHGDIA	MSTRG_17681	0.84756	POS	0	0	0	1
ARMC1	MSTRG_17681	0.86431	POS	0	0	0	1
ASH2L	MSTRG_17681	0.85195	POS	0	0	1	0
ATAD3	MSTRG_17681	0.85186	POS	0	0	1	0
BAZ2B	MSTRG_17681	0.81256	POS	0	0	1	0
BET1L	MSTRG_17681	0.89769	POS	0	0	1	0
BNIP1	MSTRG_17681	0.80341	POS	0	0	0	1
BOP1	MSTRG_17681	0.8591	POS	0	0	0	1
C14orf119	MSTRG_17681	0.89628	POS	0	0	1	0
CANT1	MSTRG_17681	0.8019	POS	0	0	1	1
CAPN5	MSTRG_17681	0.81368	POS	0	0	1	0
CD320	MSTRG_17681	0.84232	POS	0	0	1	0
CENPX	MSTRG_17681	0.82526	POS	0	0	0	1
CERS5	MSTRG_17681	0.8051	POS	0	0	1	0
CHMP1A	MSTRG_17681	0.81621	POS	0	0	1	1
CKB	MSTRG_17681	0.85264	POS	0	0	1	0
CLU	MSTRG_17681	0.82237	POS	0	0	1	0
CMTM3	MSTRG_17681	0.83609	POS	0	0	1	0
COG2	MSTRG_17681	0.83025	POS	0	0	1	0
COMMD2	MSTRG_17681	0.83262	POS	0	0	1	0
COMMD5	MSTRG_17681	0.83807	POS	0	0	0	1
COPA	MSTRG_17681	0.91062	POS	0	0	1	0
COPB2	MSTRG_17681	0.90552	POS	0	0	1	0
COPE	MSTRG_17681	0.86506	POS	0	0	1	0
CTNND1	MSTRG_17681	0.87801	POS	0	0	0	1
DGAT1	MSTRG_17681	0.82662	POS	0	0	0	1
DIEXF	MSTRG_17681	0.86067	POS	0	0	0	1
DSTN	MSTRG_17681	0.84035	POS	0	0	1	0
EMC1	MSTRG_17681	0.84343	POS	0	0	1	0
ENSBTAG00000019237	MSTRG_17681	0.89099	POS	0	0	1	1
ENSBTAG00000032259	MSTRG_17681	0.85654	POS	0	0	0	1
ENSBTAG00000038926	MSTRG_17681	0.83166	POS	0	0	0	1
ENSBTAG00000045971	MSTRG_17681	0.87581	POS	0	0	1	0
ENSBTAG00000046416	MSTRG_17681	0.8281	POS	0	0	1	0
FANCC	MSTRG_17681	0.87888	POS	0	0	0	1
FBXO33	MSTRG_17681	0.85569	POS	0	0	1	1
GINS1	MSTRG_17681	0.85484	POS	0	0	1	0
GNAQ	MSTRG_17681	0.82389	POS	0	0	1	1
GNG2	MSTRG_17681	0.80549	POS	0	0	1	0
GOLGA5	MSTRG_17681	0.8834	POS	0	0	1	0
GTF3C1	MSTRG_17681	0.84526	POS	0	0	0	1
HTRA2	MSTRG_17681	0.8836	POS	0	0	1	0
JAG1	MSTRG_17681	0.84721	POS	0	0	1	0
LETM1	MSTRG_17681	0.81568	POS	0	0	0	1
MFSD12	MSTRG_17681	0.87728	POS	0	0	1	0
MRTO4	MSTRG_17681	0.85422	POS	0	0	1	0
MSTRG_12135	MSTRG_17681	0.83046	POS	1	0	1	0
MSTRG_15196	MSTRG_17681	0.82599	POS	0	0	1	0
MSTRG_15243	MSTRG_17681	0.80583	POS	1	0	1	0
MSTRG_15613	MSTRG_17681	0.85074	POS	0	0	1	0
MTSS1	MSTRG_17681	0.83103	POS	0	0	1	1
MYO10	MSTRG_17681	0.8265	POS	0	0	0	1
NECAP1	MSTRG_17681	0.86953	POS	0	0	1	0
NT5DC1	MSTRG_17681	0.81318	POS	0	0	1	0
OSBP	MSTRG_17681	0.80011	POS	0	0	1	0
OTULIN	MSTRG_17681	0.87226	POS	0	0	0	1
PARG	MSTRG_17681	0.86035	POS	0	0	0	1
PARP10	MSTRG_17681	0.8191	POS	0	0	0	1
PARP4	MSTRG_17681	0.80691	POS	0	0	1	0
PDCL	MSTRG_17681	0.86343	POS	0	0	0	1
PEX16	MSTRG_17681	0.81235	POS	0	0	0	1
PGD	MSTRG_17681	0.87242	POS	0	0	1	0
PLEKHG3	MSTRG_17681	0.88234	POS	0	0	1	0
PPFIA1	MSTRG_17681	0.81215	POS	0	0	1	1
PPIE	MSTRG_17681	0.80983	POS	0	0	0	1
PSEN1	MSTRG_17681	0.86842	POS	0	0	0	1
PTGDS	MSTRG_17681	0.86019	POS	0	0	1	0
PUF60	MSTRG_17681	0.83909	POS	0	0	0	1
RAB6A	MSTRG_17681	0.83119	POS	0	0	0	1
RAB7A	MSTRG_17681	0.84046	POS	0	0	1	0
RAD23B	MSTRG_17681	-0.81069	NEG	0	0	1	0
RNF126	MSTRG_17681	0.81974	POS	0	0	1	0
RNF40	MSTRG_17681	0.84751	POS	0	0	1	0
RTCB	MSTRG_17681	0.87116	POS	0	0	1	0
SCARNA6	MSTRG_17681	0.81622	POS	0	0	1	0
SH3GLB2	MSTRG_17681	0.87458	POS	0	0	1	0
SLC25A15	MSTRG_17681	0.82777	POS	0	0	1	0
SLC25A5	MSTRG_17681	0.83823	POS	0	0	1	0
SLC9A9	MSTRG_17681	0.84016	POS	0	0	0	1
SLU7	MSTRG_17681	0.83864	POS	0	0	1	0
SMARCAD1	MSTRG_17681	0.8615	POS	0	0	1	0
SMCR8	MSTRG_17681	0.80627	POS	0	0	0	1
SNRNP200	MSTRG_17681	0.80407	POS	0	0	1	0
SPRYD3	MSTRG_17681	0.89796	POS	0	0	1	0
SPTY2D1	MSTRG_17681	0.82683	POS	0	0	1	0
SUCO	MSTRG_17681	0.86329	POS	0	0	1	0
SUPT16H	MSTRG_17681	0.82244	POS	0	0	1	0
TBCD	MSTRG_17681	0.82494	POS	0	0	1	1
TMEM39A	MSTRG_17681	0.90851	POS	0	0	1	0
TOP3A	MSTRG_17681	0.85729	POS	0	0	0	1
TPCN2	MSTRG_17681	0.84926	POS	0	0	1	1
TRIM56	MSTRG_17681	0.8022	POS	0	0	1	0
TRRAP	MSTRG_17681	0.82969	POS	0	0	1	0
TVP23B	MSTRG_17681	0.86854	POS	0	0	1	0
UNC119	MSTRG_17681	0.8142	POS	0	0	0	1
UPF1	MSTRG_17681	0.8113	POS	0	0	1	0
VCPIP1	MSTRG_17681	0.82143	POS	0	0	0	1
XAB2	MSTRG_17681	0.8195	POS	0	0	1	0
XPO6	MSTRG_17681	0.88295	POS	0	0	1	0
XPR1	MSTRG_17681	0.85815	POS	0	0	1	0
YWHAB	MSTRG_17681	0.88953	POS	0	0	1	0
ZBTB8OS	MSTRG_17681	0.82455	POS	0	0	1	0
ZDHHC18	MSTRG_17681	0.85622	POS	0	0	1	0
ZNF276	MSTRG_17681	0.84983	POS	0	0	0	1
